# Supplementary material for: Modulation of Primary Immune Response by Different Vaccine Adjuvants
Source: PubMed Central journal article supplement (PMC5066114; doi:10.3389/fimmu.2016.00427), 2016-10-17
Supplement: Table_1.pdf [file Table_1.pdf]

**Table S1.** Cytokine/chemokine concentration in splenocyte supernatants <sup>a</sup>.

| <b>Cytokine/<br/>chemokine</b> | <b>H56</b> | <b>o/w<br/>squalene</b> | <b>CAF01</b> | <b>alum</b> | <b>CpG</b>  |
|--------------------------------|------------|-------------------------|--------------|-------------|-------------|
| <b>Eotaxin</b>                 | 358±96     | 101 ± 106               | 516 ± 128    | 370 ± 147   | 204 ± 191   |
| <b>G-CSF</b>                   | 17,6±36    | 6,8 ± 84,44             | 5,4 ± 4,9    | 12,6 ± 21,9 | 11 ± 6,9    |
| <b>GM-CSF</b>                  | 115±50,5   | 68,2 ± 44,3             | 1431 ± 531   | 147 ± 62,4  | 37,4 ± 19,3 |
| <b>IFN-γ</b>                   | 45±29,8    | 89,6 ± 98,1             | 7810 ± 3674  | 126 ± 48,3  | 69,4 ± 41,8 |
| <b>IL-10</b>                   | 98,2±31,1  | 19,6 ± 16,2             | 74,6 ± 22,5  | 56,4 ± 46,9 | 27,8 ± 14,8 |
| <b>IL-12p40</b>                | 1,4±2,1    | 5.9 ± 4,9               | 51,2 ± 24,2  | 3,4 ± 3,2   | 21,2 ± 6,3  |
| <b>IL-12p70</b>                | 34±5       | 23 ± 24,1               | 99,6 ± 17,5  | 29 ± 11,2   | 21,8 ± 6,9  |
| <b>IL-13</b>                   | 1809±483   | 186 ± 127,6             | 1556 ± 872   | 782 ± 535   | 42 ± 18,5   |
| <b>IL-17A</b>                  | 5,6±2,1    | 16,2 ± 13,4             | 3779 ± 4416  | 12,4 ± 16,3 | 10,4 ± 5,8  |
| <b>IL-1α</b>                   | 3±0,7      | 2,4 ± 3,4               | 7,6 ± 1,1    | 2,4 ± 1,1   | 2 ± 0,7     |
| <b>IL-1b</b>                   | 71,4±17,2  | 32,6 ± 35,1             | 69,2 ± 34,4  | 54,8 ± 20,3 | 55,8 ± 15,8 |
| <b>IL-2</b>                    | 587±173    | 643 ± 127               | 1324 ± 646   | 398 ± 267   | 196 ± 82    |
| <b>IL-3</b>                    | 96,8±30    | 45,8 ± 24,1             | 364 ± 143    | 106 ± 60    | 13,2 ± 6,3  |
| <b>IL-4</b>                    | 81,8±12,5  | 34,8 ± 28,2             | 26,2 ± 8,5   | 52 ± 41,3   | 30,4 ± 13,7 |
| <b>IL-5</b>                    | 981±222    | 114 ± 65                | 66 ± 44      | 177 ± 140   | 7,6 ± 9,1   |
| <b>IL-6</b>                    | 21,4±9,9   | 23,2 ± 27,29            | 128 ± 35,8   | 23,4 ± 10,1 | 4,4 ± 1,9   |
| <b>KC</b>                      | 8,8±17,8   | 3,2 ± 55,6              | 11,2 ± 5     | 2,8 ± 14,2  | 4,6 ± 7,3   |
| <b>MCP-1</b>                   | 3608±419   | 1473 ± 1074             | -668 ± 472   | 3278 ± 1621 | -89 ± 210   |
| <b>MIP-1α</b>                  | 626±168    | 140 ± 186               | 572 ± 685    | 364 ± 170   | 259 ± 111   |
| <b>MIP-1β</b>                  | 2210±487   | 425 ± 203               | 800 ± 622    | 1559 ± 704  | 334 ± 127   |
| <b>RANTES</b>                  | 63,6±34,7  | 60,4 ± 89,7             | 266 ± 41     | 40 ± 36,4   | 48 ± 20,3   |
| <b>TNF-α</b>                   | 13,2±3,2   | 9,7 ± 9                 | 21 ± 7,2     | 7,8 ± 6,9   | 7,7 ± 1,4   |

<sup>a</sup> Multiplex immunoassay in culture supernatants of splenocytes from mice naïve or immunized with vaccine formulations including H56 antigen alone or combined with o/w squalene, CAF01, alum, CpG, and restimulated with H56 antigen for 72 hours. Values, expressed as pg/ml, are reported as the arithmetic mean ± SD of H56-stimulated *minus* the respective unstimulated samples, of 5 animal per group.
